# Supplementary material
Source: Springer Nature journal article supplement (https://www.springermedizin.de/resource/supplementary/13054_2013_1927_MOESM8_ESM.pdf/9711896)

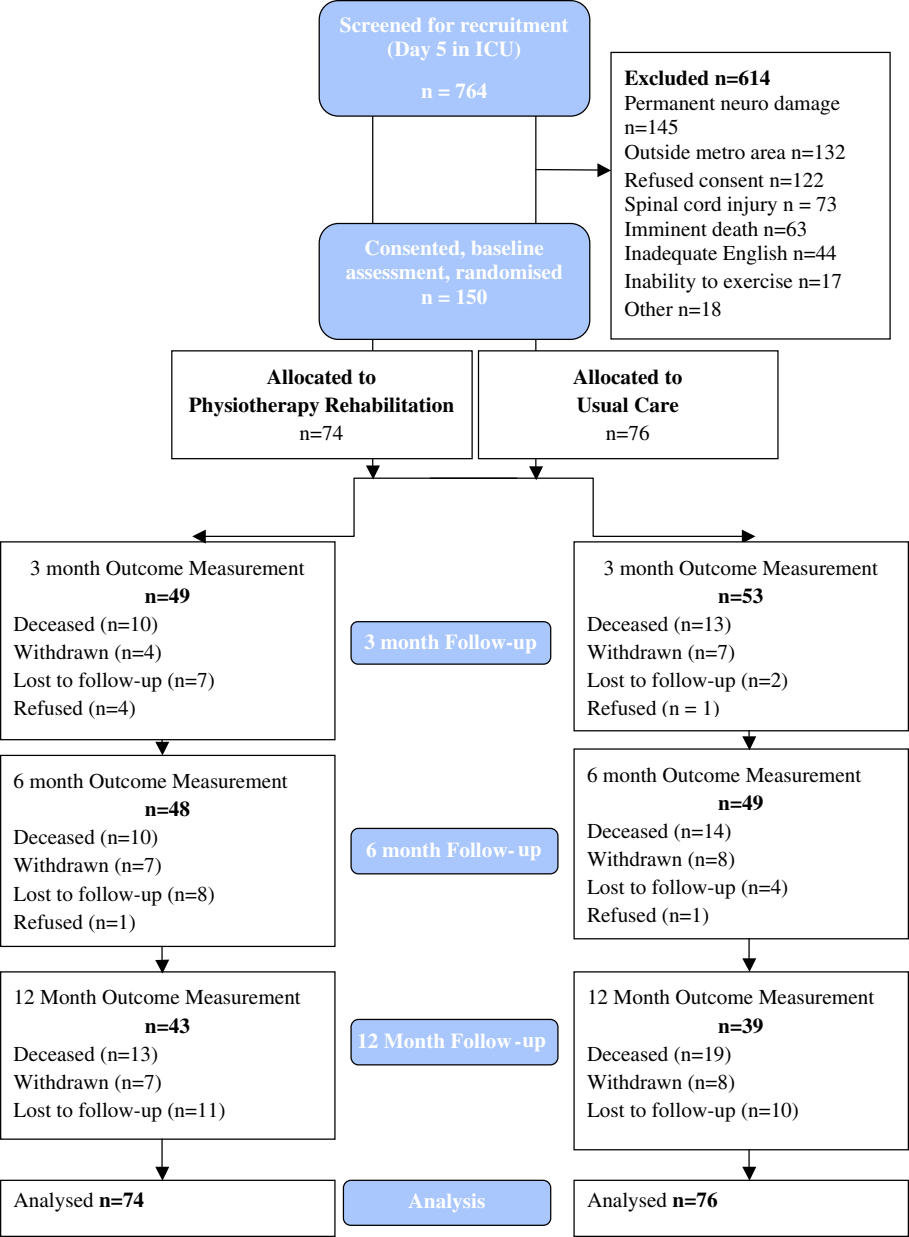

Supplement: MOESM8 [file 9711896]
